# Supplementary material for: A pH-responsive AIE nanoprobe as a drug delivery system for bioimaging and cancer therapy
Source: Royal Society of Chemistry journal article supplement (doi:10.1039/c5tb01169h), 2015-01-01
Supplement: c5tb01169h1.pdf [file c5tb01169h1.pdf]

## pH-responsive AIE nanoprobe as drug delivery system for bioimaging and cancer therapy

Haibo Wang<sup>a</sup>, Gongyan Liu<sup>bc\*</sup>, Shihua Dong<sup>a</sup>, Junjie Xiong<sup>d</sup>, Zongliang Du<sup>a</sup>,  
Xu Cheng<sup>a\*</sup>

<sup>a</sup> College of Light Industry, Textile and Food Engineering, Sichuan University, Chengdu, 610065, China. E-mail: scuchx@163.com

<sup>b</sup> National Engineering Laboratory of Clean Technology of Leather Manufacture, Sichuan University, Chengdu 610065, China. Email: lgy\_3506@163.com

<sup>c</sup> National Engineering Research Center for Biomaterials, Sichuan University, Chengdu 610065, China.

<sup>d</sup> Department of Pancreatic Surgery, West China Hospital, Sichuan University, Chengdu 610041, China.

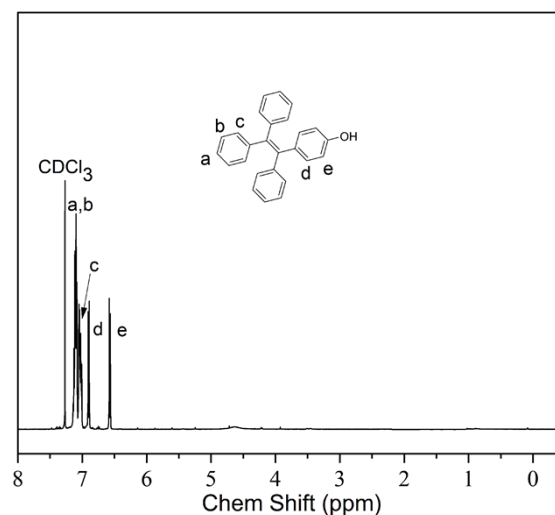

**Fig. S1** <sup>1</sup>H NMR spectrum of TPE-OH

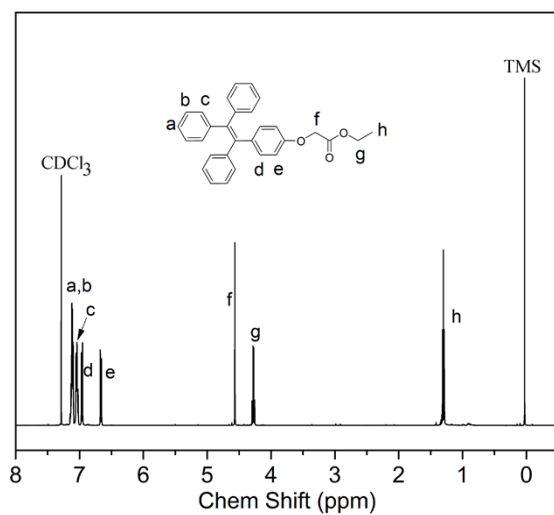

**Fig. S2**  $^1\text{H}$  NMR spectrum of TPE-AcOEt

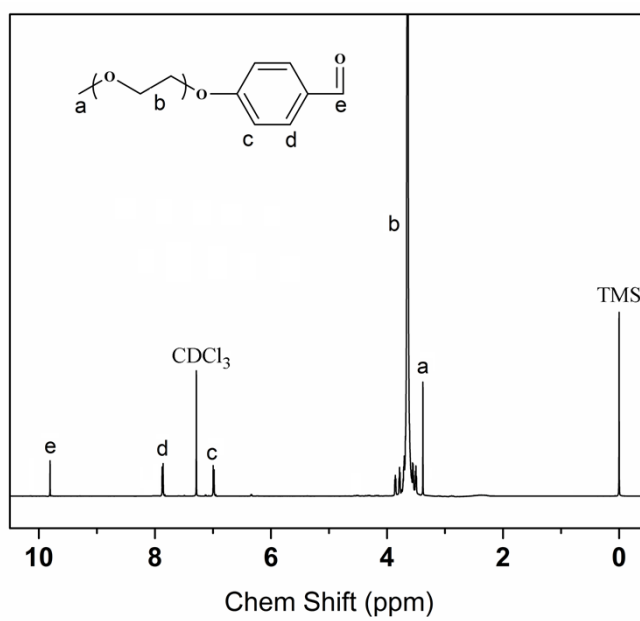

**Fig. S3**  $^1\text{H}$  NMR spectrum of MPEG- $\text{C}_6\text{H}_4\text{CHO}$ .

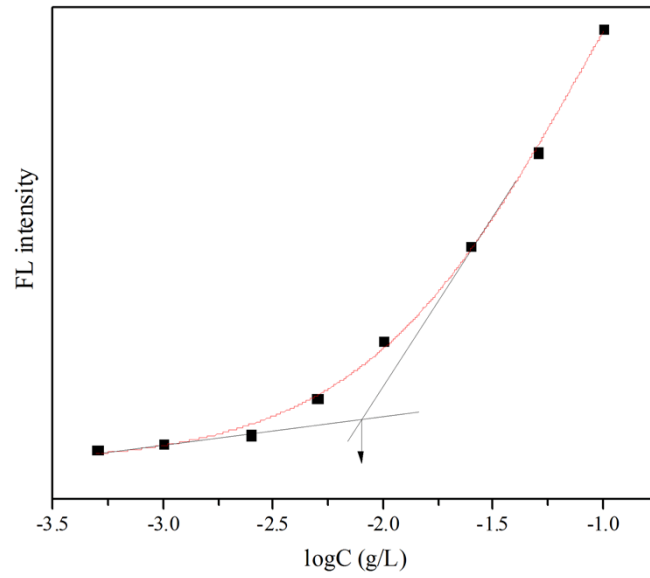

**Fig.S4** the fluorescence emission intensity versus log of the MPEG-hyd-TPE concentration.

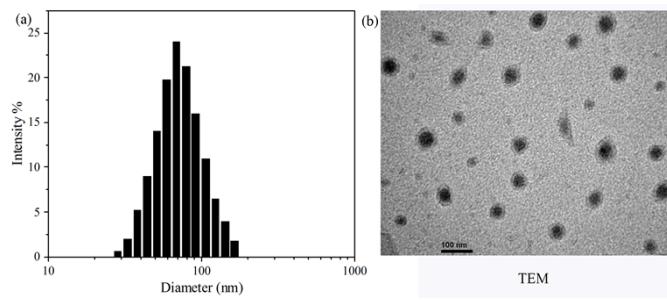

**Fig.S5** DLS plot (a) and TEM image (b) of drug loaded micelles.
